# Supplementary material for: Development and Characterisation of Composites Prepared from PHBV Compounded with Organic Waste Reinforcements, and Their Soil Biodegradation
Source: MDPI journal article supplement (doi:10.3390/ma17030768), 2024-02-05
Supplement: s1 [file s1]

## Supplementary File

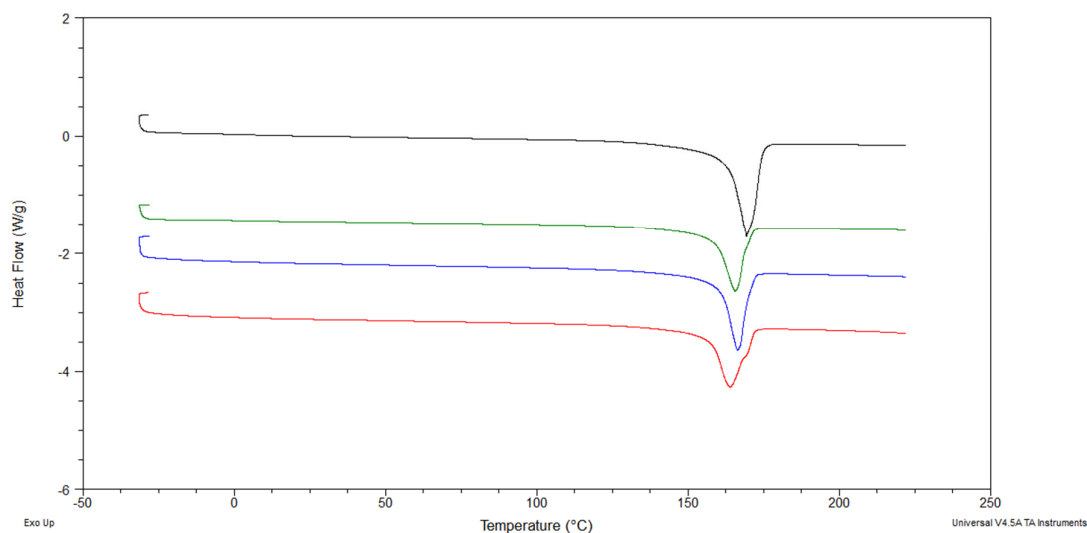

**Figure S1.** Characterisation by DSC (second heating) of neat PHBV (top), 30% chitin, 30% SD and 30% HHW (bottom).

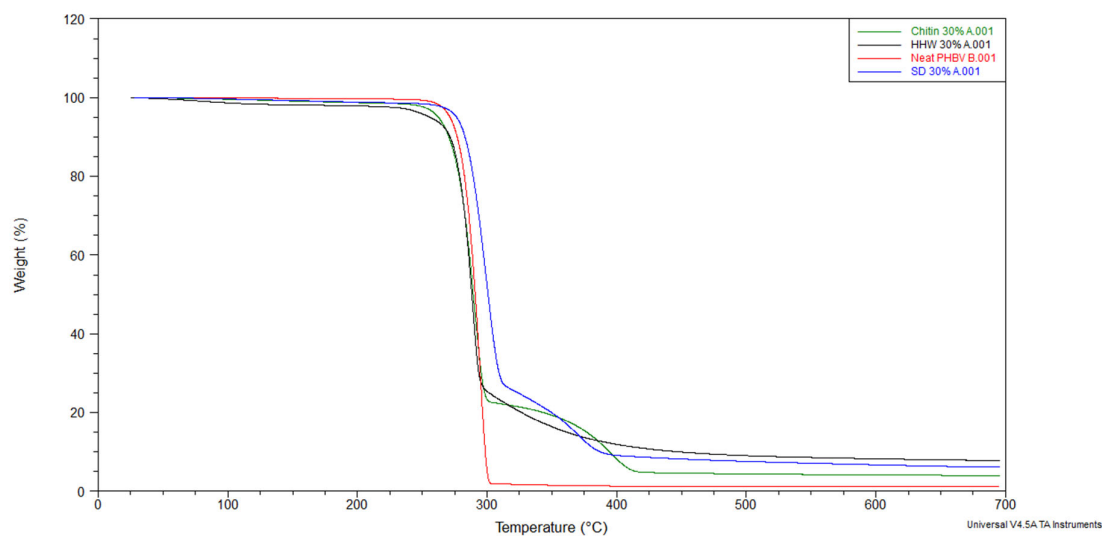

**Figure S2.** Thermogravimetric analysis of the neat polymer as well as with 30% loading of the organic waste.

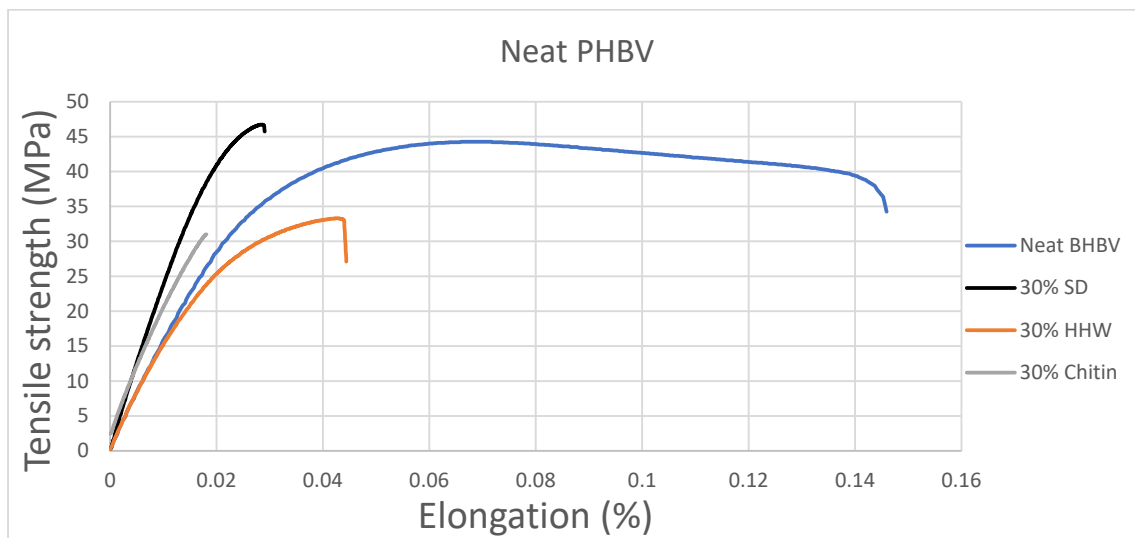

**Figure S3.** Tensile strength at break for the neat polymer as well as with 30% loading of the organic waste.
